# Supplementary material for: Revealing the therapeutic targets and molecular mechanisms of emodin-treated coronavirus disease 2019 via a systematic study of network pharmacology
Source: Aging (Albany NY). 2021 Jun 4;13(11):14571–89. doi: 10.18632/aging.203098 (PMC8221358; doi:10.18632/aging.203098)
Supplement: Supplementary Figures [file aging-13-203098-s001.pdf]

## SUPPLEMENTARY FIGURES

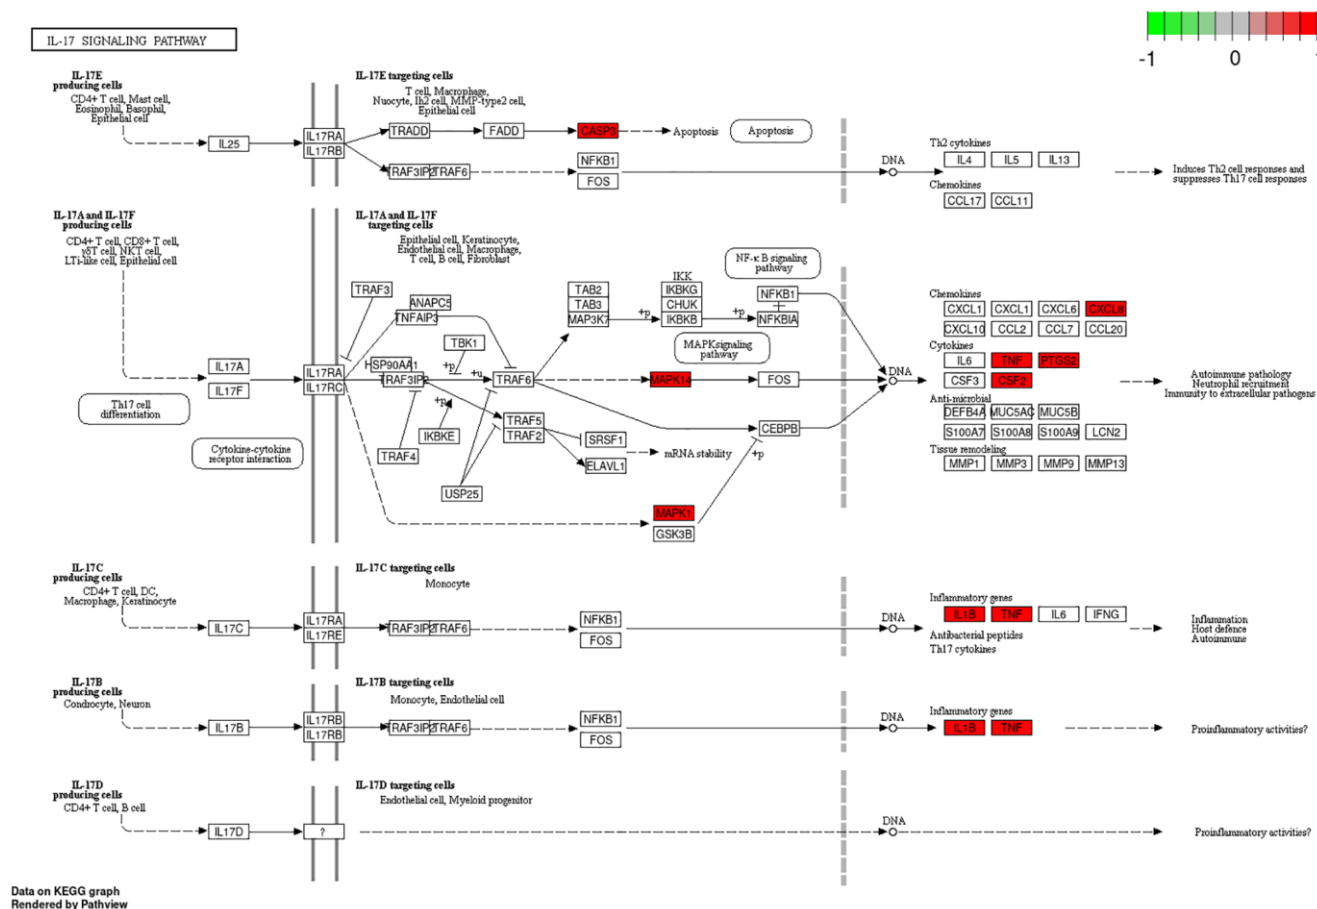

**Supplementary Figure 1. IL-17 signaling pathway as one of the main pathways related to the therapeutic mechanism of emodin.**

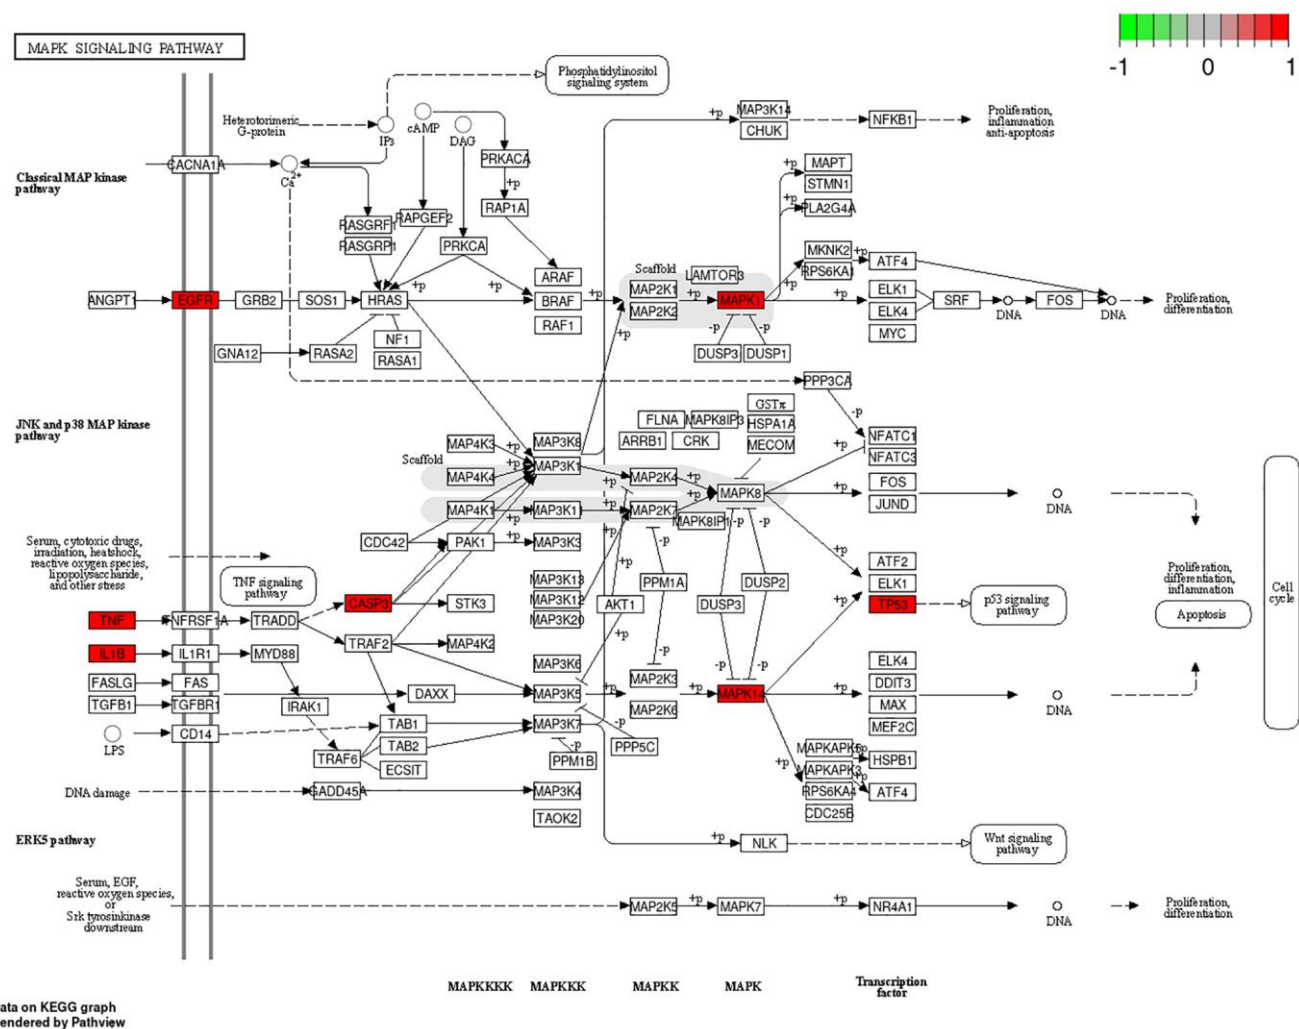

Supplementary Figure 2. MAPK signaling pathway as one of the main pathways related to the therapeutic mechanism of emodin.

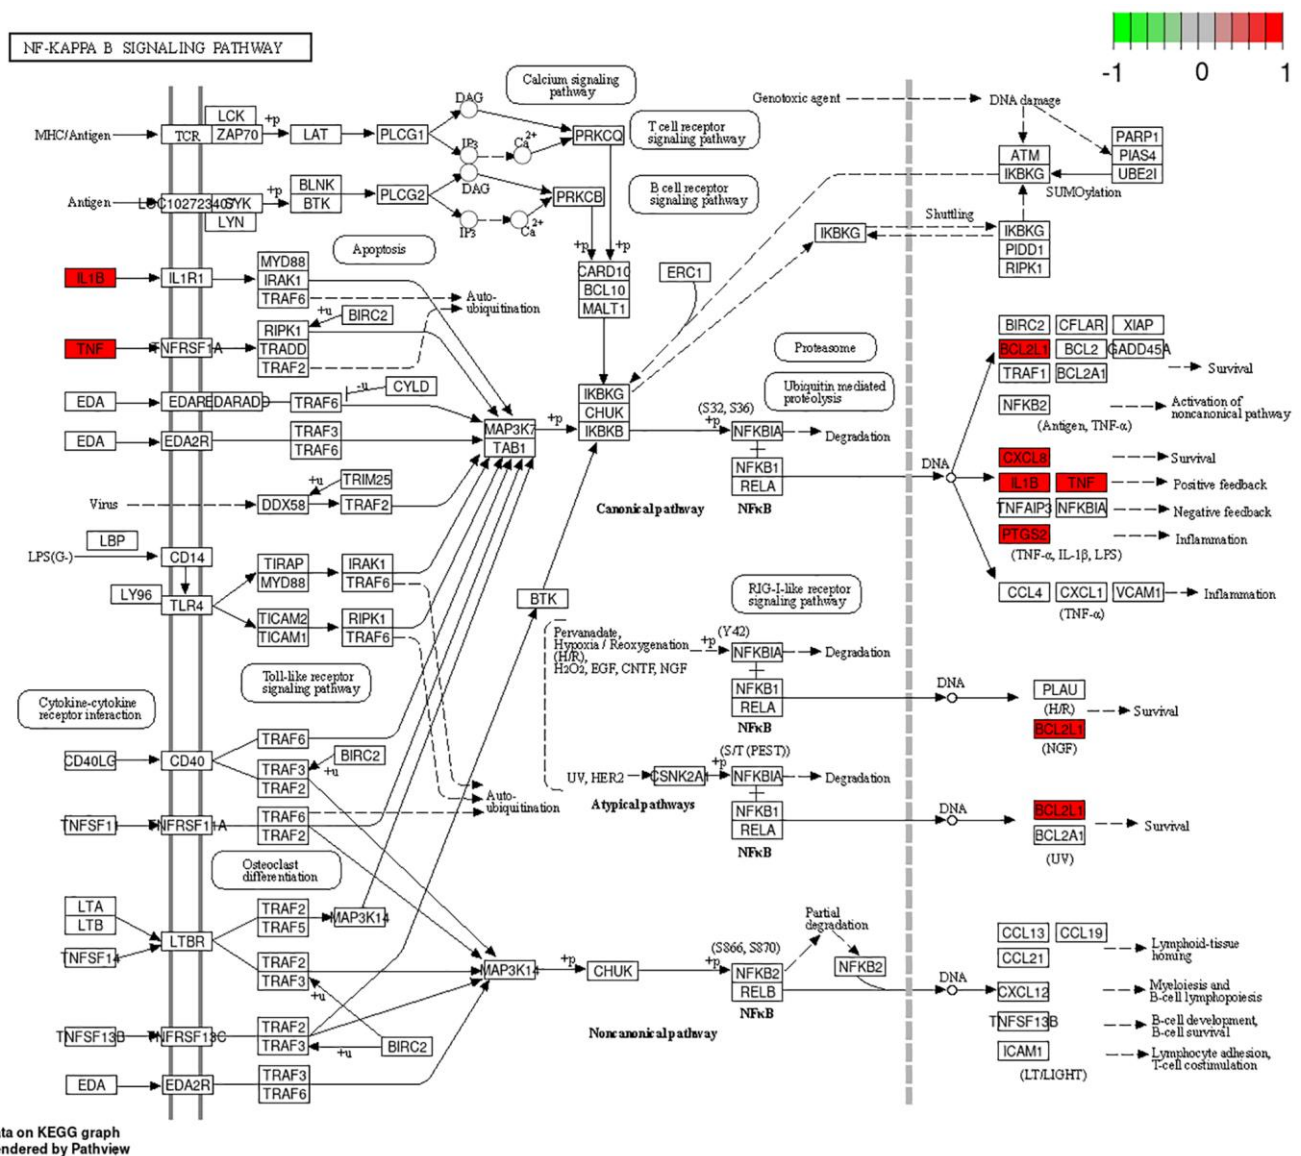

**Supplementary Figure 3. NF-kappa B signaling pathway as one of the main pathways related to the therapeutic mechanism of emodin.**

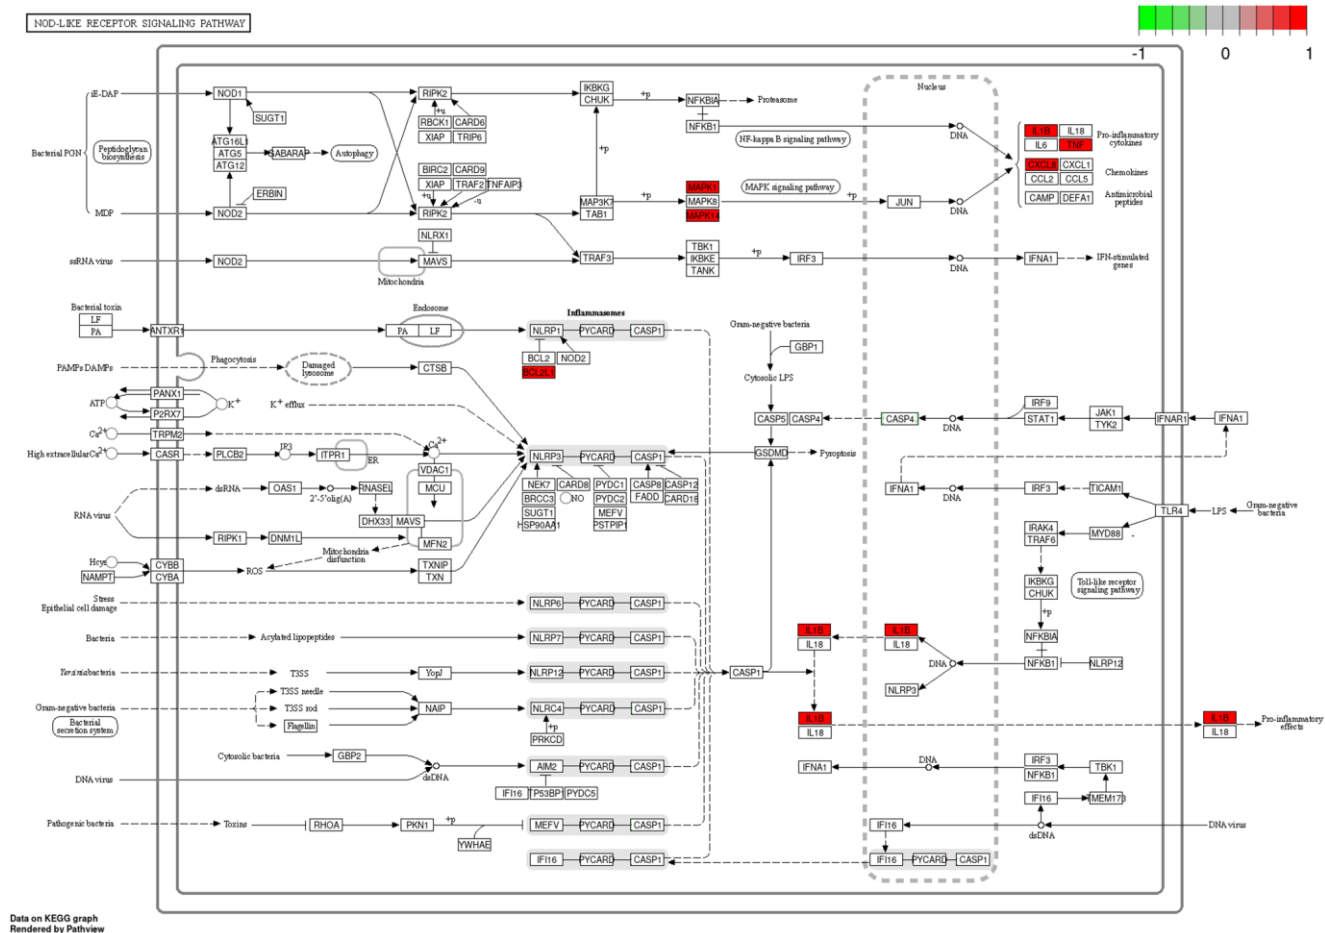

**Supplementary Figure 4. NOD-like receptor signaling pathway as one of the main pathways related to the therapeutic mechanism of emodin.**
